# Supplementary material
Source: MDPI journal article supplement (https://www.mdpi.com/2227-9040/11/3/181)
Supplement: s1 [file s1]

Supplementary material

# Graphene Nanogap Interdigitated Asymmetric Electrodes for Photodetection

Rabiaa Elkarous <sup>1,2,\*</sup>, Afrah Bardaoui <sup>1</sup>, Jérôme Borme <sup>3</sup>, Nabil Sghaier <sup>1</sup>, Pedro Alpuim <sup>3,4</sup>, Diogo M.F. Santos <sup>5,\*</sup>, Radhouane Chtourou <sup>1</sup>

<sup>1</sup> Laboratory of Nanomaterials and Systems for Renewable Energies (LaNSER), Research and Technology Centre of Energy (CRTE) Borj Cedria Science and Technology Park, 2050 Hammam-Lif, Tunisia

<sup>2</sup> Faculty of Sciences of Tunis (FST), University of Tunis El Manar, Campus Universitaire El Manar, 2092 Tunis, Tunisia

<sup>3</sup> 2D Materials and Devices Group, International Iberian Nanotechnology Laboratory, 4715-330 Braga, Portugal

<sup>4</sup> Department of Physics, University of Minho, 4710-057 Braga, Portugal

<sup>5</sup> Center of Physics and Engineering of Advanced Materials, Laboratory for Physics of Materials and Emerging Technologies, Chemical Engineering Department, Instituto Superior Técnico, Universidade de Lisboa, 1049-001 Lisbon, Portugal

\* Correspondence: rabiaa.elkarous@fst.utm.tn (R.E.); diogosantos@tecnico.ulisboa.pt (D.M.F.S.)

**Table S1.** Power of light used in the photoresponsivity measurement.

| $\lambda/\text{nm}$               | 400  | 500  | 600  | 700  | 800  | 900  |
|-----------------------------------|------|------|------|------|------|------|
| Power density / $\text{W m}^{-2}$ | 0.47 | 1.09 | 1.42 | 1.32 | 1.16 | 1.47 |

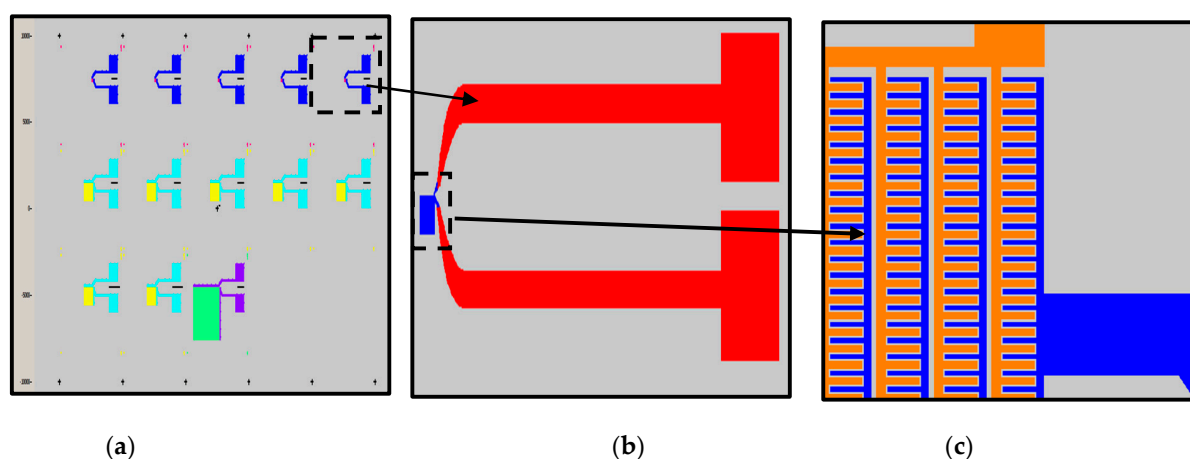

**Figure S1.** Illustration of the devices' design using LibreCAD software, including (a) the overview of all devices, (b) zoom on 100  $\mu\text{m}$  device, and (c) zoom on the IDEs (Au-Pt).

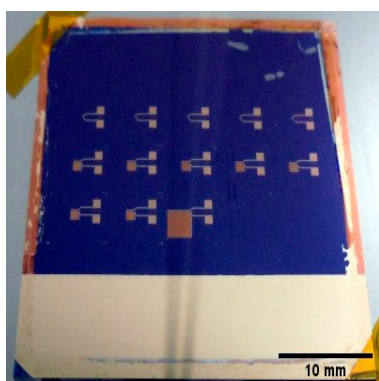

(a)

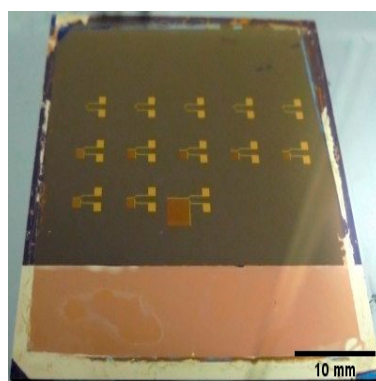

(b)

**Figure S2.** Optical images of devices (a) before and (b) after ion milling.

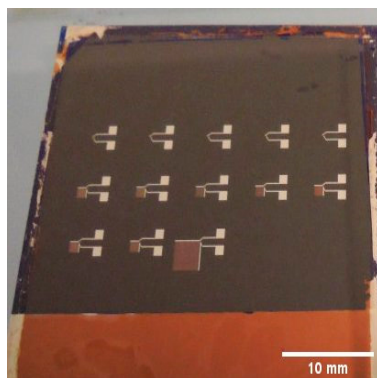

**Figure S3.** Optical images of devices.

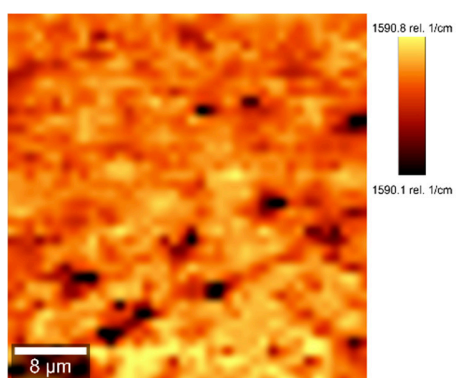

(a)

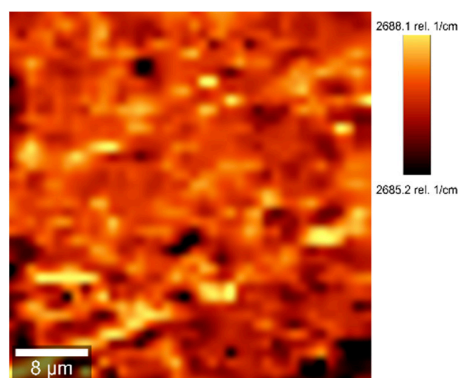

(b)

**Figure S4.** Raman mapping of (a) the G and (b) 2D bands positions.
